# Supplementary material for: Fatigue is Highly Prevalent in Patients with Asthma and Contributes to the Burden of Disease
Source: PubMed Central journal article supplement (PMC6306949; doi:10.3390/jcm7120471), 2018-11-23
Supplement: jcm-07-00471-s001.pdf [file jcm-07-00471-s001.pdf]

## Online Data Supplement

### Title

Fatigue is highly prevalent in patients with asthma and contributes to the burden of disease

### Authors

Maarten Van Herck, Martijn A. Spruit, Chris Burtin, Remco Djamin, Jeanine Antons, Yvonne M.J.

Goertz, Zjala Ebadi, Daisy J.A. Janssen, Jan H. Vercoulen, Jeannette B. Peters, Melissa S.Y. Thong,

Jacqueline Otter, Arnold Coors, Mirjam A.G. Sprangers, Jean W.M. Muris, Emiel F.M. Wouters, and

Alex van 't Hul

**Table S1.** Spearman rank correlation coefficients of demographical, health status and disease-specific characteristics with fatigue in asthmatic patients ( $n = 733$ ).

| Demographical, health status and disease-specific characteristics       | CIS-Fatigue (p)         |                |
|-------------------------------------------------------------------------|-------------------------|----------------|
|                                                                         | Correlation coefficient | p-value        |
| Gender (male)                                                           | $\rho$ 0.139            | < <b>0.001</b> |
| Age (years)                                                             | $\rho$ -0.115           | <b>0.002</b>   |
| Weight (kg)                                                             | $\rho$ 0.030            | 0.414          |
| Waist circumference <sup>a</sup> (cm)                                   | $\rho$ 0.087            | 0.022          |
| BMI (kg/m <sup>2</sup> )                                                | $\rho$ 0.132            | < <b>0.001</b> |
| Exacerbations last 12 months <sup>b</sup> (n)                           | $\rho$ 0.200            | < <b>0.001</b> |
| Hospitalization last 12 months <sup>c</sup> (n)                         | $\rho$ 0.091            | 0.026          |
| Smoking status <sup>d</sup> (current smoker)                            | $\rho$ -0.030           | 0.432          |
| Level of education <sup>e</sup> (secondary general education or higher) | $\rho$ 0.145            | < <b>0.001</b> |
| Employment status <sup>f</sup> (paid work)                              | $\rho$ -0.007           | 0.848          |
| 6MWT <sup>g</sup> (m)                                                   | $\rho$ -0.243           | < <b>0.001</b> |
| FEV1 (L)                                                                | $\rho$ -0.083           | 0.025          |
| FVC (L)                                                                 | $\rho$ -0.158           | < <b>0.001</b> |
| FEV1/VC*100 (%)                                                         | $\rho$ 0.133            | < <b>0.001</b> |
| CCI <sup>h</sup> (p)                                                    | $\rho$ 0.070            | 0.162          |
| MRC-Dyspnea <sup>i</sup> (p)                                            | $\rho$ 0.435            | < <b>0.001</b> |
| AQLQ <sup>j</sup> (p)                                                   | $\rho$ -0.554           | < <b>0.001</b> |
| AQLQ symptoms <sup>j</sup> (p)                                          | $\rho$ -0.477           | < <b>0.001</b> |
| AQLQ activity limitation <sup>j</sup> (p)                               | $\rho$ -0.591           | < <b>0.001</b> |
| AQLQ emotional function <sup>j</sup> (p)                                | $\rho$ -0.361           | < <b>0.001</b> |
| AQLQ environmental exposure <sup>j</sup> (p)                            | $\rho$ -0.345           | < <b>0.001</b> |
| ACQ <sup>k</sup> (p)                                                    | $\rho$ 0.455            | < <b>0.001</b> |

P-value in bold indicates a significant association with fatigue ( $p < 0.01$ ). Alphabetic characters in superscript indicates a sample size deviant from  $n = 733$  with: a.  $n = 696$ , b.  $n = 631$ , c.  $n = 601$ , d.  $n = 684$ , e.  $n = 686$ , f.  $n = 676$ , g.  $n = 652$ , h.  $n = 397$ , i.  $n = 532$ , j.  $n = 653$ , and k.  $n = 664$ . Abbreviations: AQLQ: Asthma Quality of Life Questionnaire; ACQ: Asthma Control Questionnaire; BMI: Body Mass Index; CIS-Fatigue: Checklist Individual Strength-Fatigue; CCI: Charlson Comorbidity Index; FEV1: Forced Expiratory Volume in one second; FEV1/VC\*100: Tiffeneau index; FVC: Forced Vital Capacity; n: number of

subjects; p: points; MRC-Dyspnea: Medical Research Council-Dyspnea; QoL: Quality of life; 6MWT: Six-Minute Walk Test.

**Table S2.** Multiple stepwise regression analysis of the significant variables associated with CIS-Fatigue.

| Model | Adjusted R <sup>2</sup> | Predictors  | Unstandardized coefficients |       | Standardized coefficients beta | t-value | Significant value |
|-------|-------------------------|-------------|-----------------------------|-------|--------------------------------|---------|-------------------|
|       |                         |             | B                           | SE    |                                |         |                   |
| 1.    | 0.210                   | (Constant)  | 27.783                      | 1.259 |                                | 22.071  | < 0.001           |
|       |                         | ACQ         | 6.205                       | 0.613 | 0.461                          | 10.116  | < 0.001           |
| 2.    | 0.275                   | (Constant)  | 25.118                      | 1.287 |                                | 19.510  | < 0.001           |
|       |                         | ACQ         | 4.280                       | 0.672 | 0.318                          | 6.373   | < 0.001           |
|       |                         | MRC-Dyspnea | 2.978                       | 0.503 | 0.295                          | 5.915   | < 0.001           |
| 3.    | 0.289                   | (Constant)  | 29.485                      | 1.982 |                                | 14.873  | < 0.001           |
|       |                         | ACQ         | 4.103                       | 0.668 | 0.305                          | 6.141   | < 0.001           |
|       |                         | MRC-Dyspnea | 3.288                       | 0.510 | 0.326                          | 6.445   | < 0.001           |
|       |                         | Age         | -0.098                      | 0.034 | -0.127                         | -2.877  | 0.004             |

Abbreviations: ACQ: Asthma Control Questionnaire; CIS-Fatigue: Checklist Individual Strength-Fatigue; MRC-Dyspnea: Medical Research Council-Dyspnea; SE: Standard Error.

**Table S3.** Spearman rank correlation coefficients of demographical, health status and disease-specific characteristics with disease-specific QoL in asthmatic patients (n = 653).

| Demographical, health status and disease-specific characteristics       | AQLQ (p)                |         |
|-------------------------------------------------------------------------|-------------------------|---------|
|                                                                         | Correlation coefficient | p-value |
| Gender (male)                                                           | $\rho$ -0.090           | 0.021   |
| Age (years)                                                             | $\rho$ 0.115            | < 0.001 |
| Weight (kg)                                                             | $\rho$ -0.071           | 0.070   |
| Waist circumference <sup>a</sup> (cm)                                   | $\rho$ -0.102           | 0.011   |
| BMI (kg/m <sup>2</sup> )                                                | $\rho$ -0.194           | < 0.001 |
| Exacerbations last 12 months <sup>b</sup> (n)                           | $\rho$ -0.279           | < 0.001 |
| Hospitalization last 12 months <sup>c</sup> (n)                         | $\rho$ -0.049           | 0.251   |
| Smoking status <sup>d</sup> (current smoker)                            | $\rho$ -0.031           | 0.450   |
| Level of education <sup>e</sup> (secondary general education or higher) | $\rho$ -0.156           | < 0.001 |
| Employment status <sup>f</sup> (paid work)                              | $\rho$ -0.011           | 0.793   |
| CIS-Fatigue (p)                                                         | $\rho$ -0.554           | < 0.001 |
| 6MWT <sup>g</sup> (m)                                                   | $\rho$ 0.287            | < 0.001 |
| FEV1 (L)                                                                | $\rho$ 0.072            | 0.067   |
| FVC(L)                                                                  | $\rho$ 0.161            | < 0.001 |
| FEV1/VC*100 (%)                                                         | $\rho$ -0.162           | < 0.001 |
| CCI <sup>h</sup> (p)                                                    | $\rho$ -0.079           | 0.132   |
| MRC-Dyspnea <sup>i</sup> (p)                                            | $\rho$ -0.488           | < 0.001 |
| ACQ <sup>j</sup> (p)                                                    | $\rho$ -0.777           | < 0.001 |

P-value in bold indicates a significant association with AQLQ (p < 0.01). Alphabetic characters in superscript indicates a sample size deviant from n = 653 with: a. n = 620, b. n = 574, c. n = 547, d. n = 612, e. n = 621, f. n = 610, g. n = 585, h. n = 361, i. n = 484, and j. n = 641. Abbreviations: AQLQ: Asthma Quality of Life Questionnaire; ACQ: Asthma Control Questionnaire; BMI: Body Mass Index; CIS-Fatigue: Checklist Individual Strengths-Fatigue; CCI: Charlson Comorbidity Index; FEV1: Forced Expiratory

Volume in one second; FEV1/VC\*100: Tiffeneau-index; FVC: Forced Vital Capacity; n: number of subjects; p: points; MRC-Dyspnea: Medical Research Council-Dyspnea; QoL: Quality of life; 6MWT: Six-Minute Walk Test.

**Table S4.** Multiple stepwise regression analysis of the significant variables associated with AQLQ.

| Model | Adjusted R <sup>2</sup> | Predictors                          | Unstandardized coefficients |       | Standardized coefficients<br>β | t-value | Significant value |
|-------|-------------------------|-------------------------------------|-----------------------------|-------|--------------------------------|---------|-------------------|
|       |                         |                                     | B                           | SE    |                                |         |                   |
| 1.    | 0.298                   | (Constant)                          | 6.920                       | 0.171 |                                | 40.370  | < 0.001           |
|       |                         | CIS-Fatigue                         | -0.053                      | 0.004 | -0.547                         | -12.750 | < 0.001           |
| 2.    | 0.384                   | (Constant)                          | 7.014                       | 0.161 |                                | 43.532  | < 0.001           |
|       |                         | CIS-Fatigue                         | -0.039                      | 0.004 | -0.397                         | -8.778  | < 0.001           |
|       |                         | MRC-Dyspnea                         | -0.322                      | 0.044 | -0.331                         | -7.338  | < 0.001           |
| 3.    | 0.410                   | (Constant)                          | 7.009                       | 0.158 |                                | 44.461  | < 0.001           |
|       |                         | CIS-Fatigue                         | -0.035                      | 0.004 | -0.362                         | -8.053  | < 0.001           |
|       |                         | MRC-Dyspnea                         | -0.319                      | 0.043 | -0.328                         | -7.427  | < 0.001           |
|       |                         | Exacerbations in the last 12 months | -0.133                      | 0.031 | -0.170                         | -4.230  | < 0.001           |
| 4.    | 0.422                   | (Constant)                          | 6.552                       | 0.218 |                                | 30.085  | < 0.001           |
|       |                         | CIS-Fatigue                         | -0.033                      | 0.004 | -0.339                         | -7.518  | < 0.001           |
|       |                         | MRC-Dyspnea                         | -0.348                      | 0.044 | -0.359                         | -7.989  | < 0.001           |
|       |                         | Exacerbations in the last 12 months | -0.135                      | 0.031 | -0.173                         | -4.349  | < 0.001           |
|       |                         | Age                                 | 0.009                       | 0.003 | 0.121                          | 3.011   | 0.003             |

Abbreviations: AQLQ: Asthma Quality of Life Questionnaire; CIS-Fatigue: Checklist Individual Strength-Fatigue; MRC-Dyspnea: Medical Research Council-Dyspnea; SE: Standard Error.
